# Supplementary material for: A Bayesian approach to modelling heterogeneous calcium responses in cell populations
Source: PLOS journal article supplement (doi:10.1371/journal.pcbi.1005794), 2017-10-06
Supplement: S7 (10.1371/journal.pcbi.1005794.s007) [file journal.pcbi.1005794.s007]

**Laplace's integral approximation.** We here show how to evaluate the integral  $\int p(\mathbf{y}|x, \theta)p(x|\theta)dx$  using Laplace's approximation. Consider a function  $f : \mathbb{R}^n \rightarrow \mathbb{R}$  with a single maximum at  $x^*$ . Taylor expanding  $f$  around  $x^*$  results in

$$f(x) = f(x^*) + \frac{1}{2}(x - x^*)^T \mathcal{L}_x^2 f(x^*)(x - x^*) + O((x - x^*)^3), \quad (1)$$

since  $\nabla_x f(x^*) = 0$ . When introducing the matrix  $A = -\mathcal{L}_x^2 f(x^*)$ , which is symmetric and positive definite, we find from Eq. (1)

$$\int_x e^{f(x)} dx \approx e^{f(x^*)} \int_x e^{-\frac{1}{2}(x-x^*)^T A (x-x^*)} dx. \quad (2)$$

The integral on the right hand side of Eq. (2) is Gaussian, so that

$$\int_x e^{f(x)} dx \approx e^{f(x^*)} \sqrt{\frac{(2\pi)^n}{\det(A)}}. \quad (3)$$

When we set  $f(x) = \log p(\mathbf{y}|x, \theta)p(x|\theta)$  and note that

$$\mathcal{L}_x^2 f(x) = \mathcal{L}_x^2 \log p(\mathbf{y}|x, \theta) - \Sigma^{-1}, \quad (4)$$

since  $p(x|\theta)$  is a GP with covariance function  $\Sigma$ , we arrive at

$$\int p(\mathbf{y}|x, \theta)p(x|\theta)dx \approx p(y|x^*, \theta)p(x^*|\theta) \sqrt{\frac{(2\pi)^n}{\det(\Lambda^* + \Sigma^{-1})}}. \quad (5)$$

with  $\Lambda^* = -\mathcal{L}_x^2 p(y|x^*, \theta)$ .
